# Supplementary material for: Hydrothermal synthesis and crystal structure of two novel aluminophosphites containing infinite Al–O–Al chainsElectronic supplementary information (ESI) available: XRD patterns and views of NKX-1 and NKX-4. See http://www.rsc.org/suppdata/jm/b2/b200507g/
Source: Royal Society of Chemistry journal article supplement (doi:10.1039/b200507g), 2002-03-21
Supplement: b200507g.doc [file b200507g.doc]

XRD patterns of unknown phase and NKX-1

XRD patterns of the heated NKX-1 and NKX-4

1. NKX-1 calcined in air at 5500C for 2 hours
2. NKX-4 calcined in air at 5500C for 2 hours
3. NKX-4 calcined in air at 2000C for 2 hours


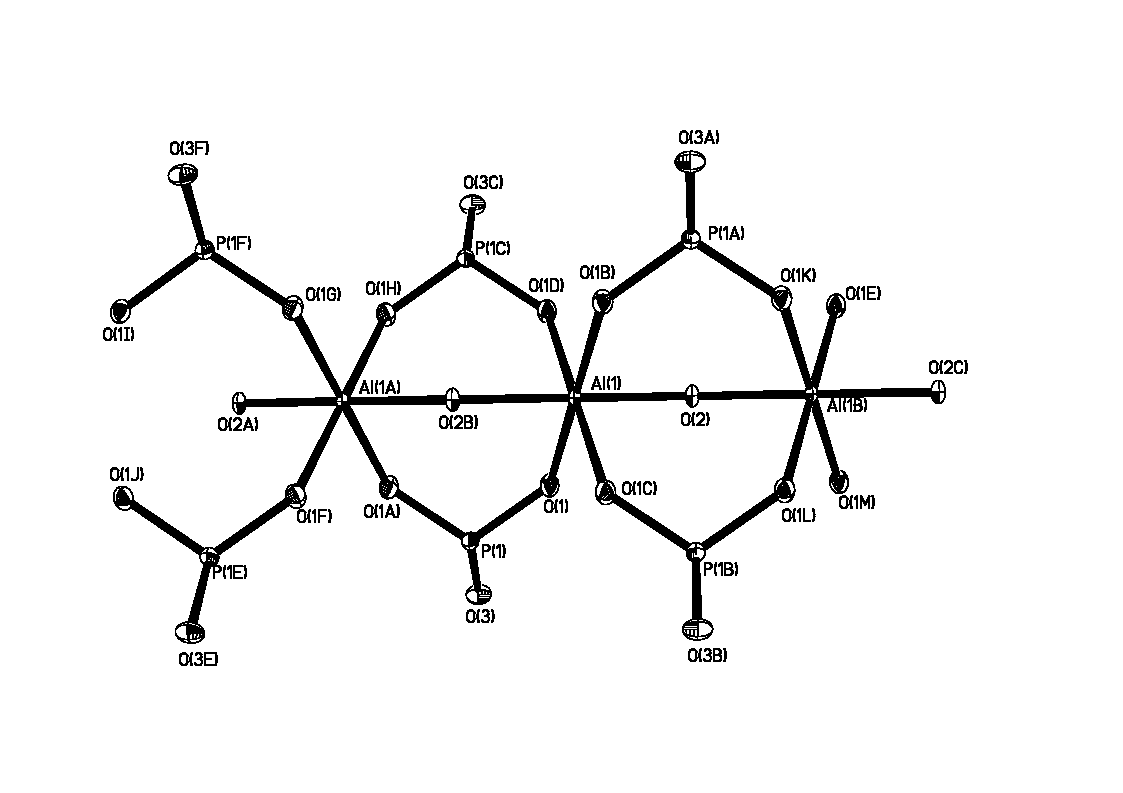


**The bonding environment of the Al and P atom in NKX-4**


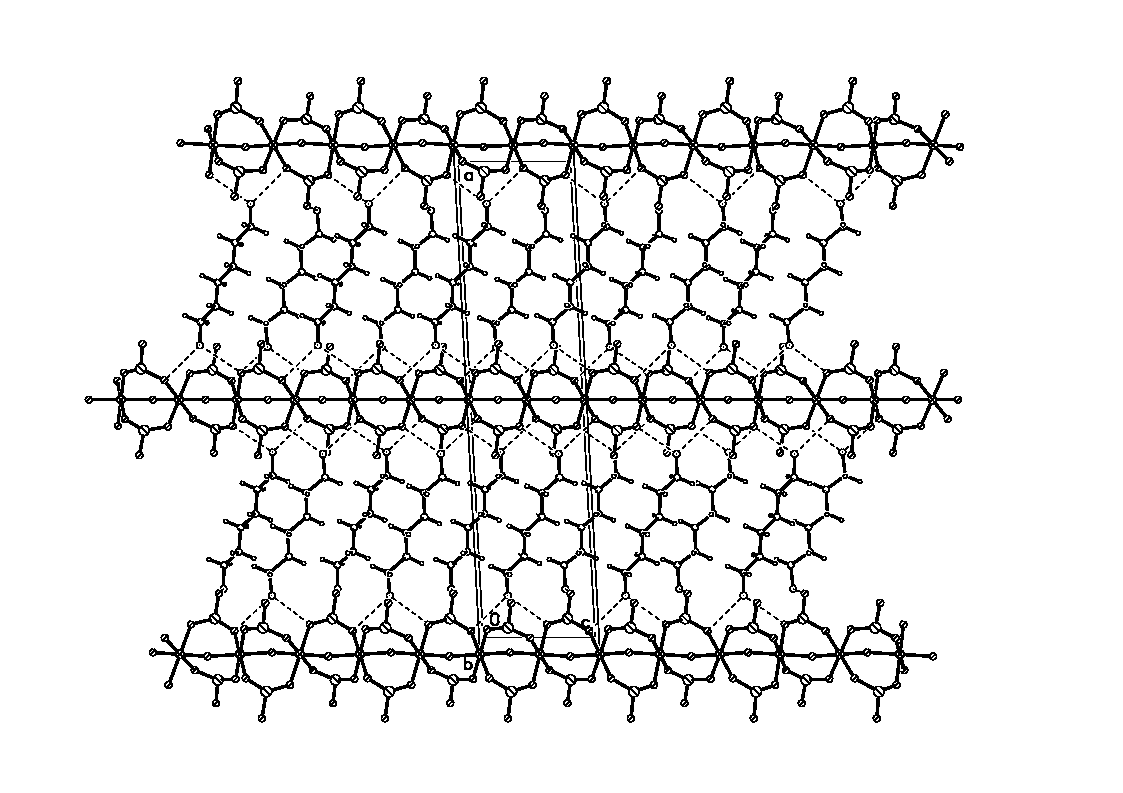


**View of NKX-1 along [100]**


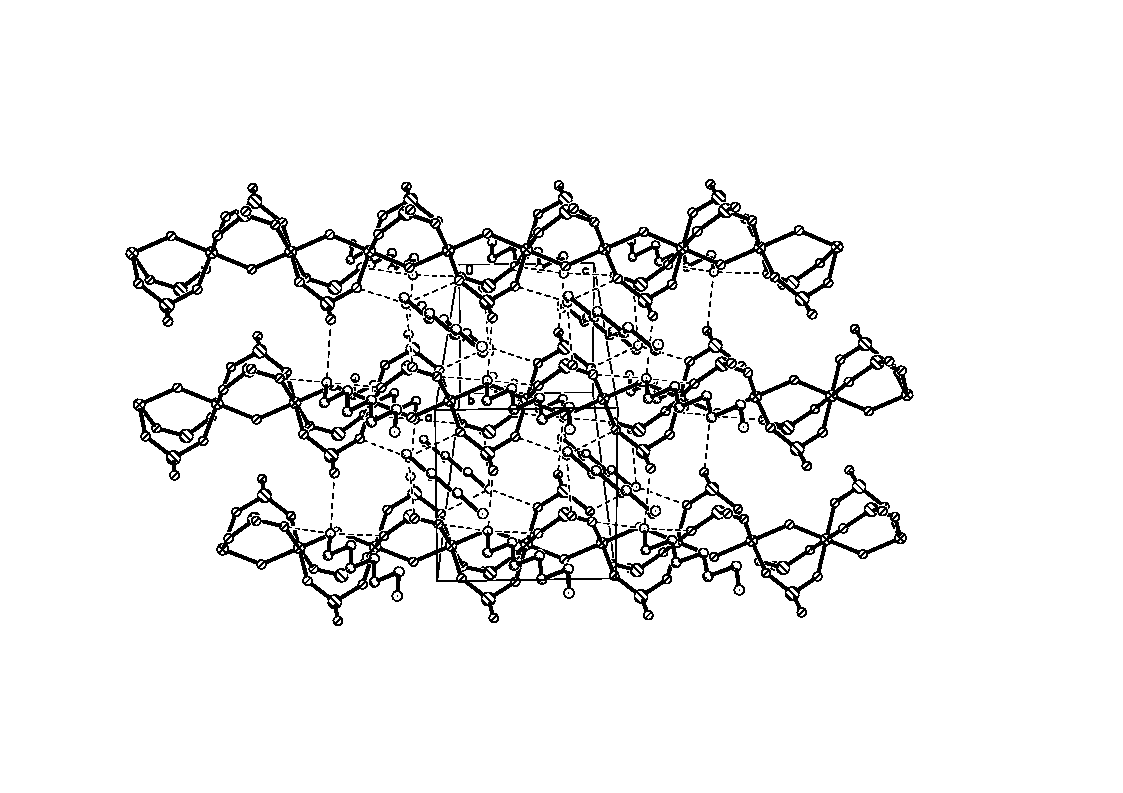


**View of NKX-1 along [001]**
